# Supplementary material
Source: publisher figshare collection journal article supplement (https://acs.figshare.com/ndownloader/files/13532456)
Supplement: Supplementary file 1 [file 13532456]

# Supporting Information

## Manuscript title:

A Net-Structured Filter of  $\text{Co}(\text{OH})_2$ -Anchored Carbon Nanofibers with Ketjen  
Black for High Performance Li-S Batteries

## Authors:

Yuebin Yang,<sup>†</sup> Leiting Zhang,<sup>†</sup> Hui Xu,<sup>‡</sup> Xusong Qin,<sup>‡,§</sup> Yuanfu Deng,<sup>‡,\*</sup> Guohua Chen<sup>†,‡,§\*</sup>

## Authors' Adresses:

<sup>†</sup>Department of Chemical and Biomolecular Engineering, The Hong Kong University of Science and  
Technology, Clear Water Bay, Kowloon, Hong Kong SAR, China;

<sup>‡</sup>Huizhou Q&C LIB Technology Co., Ltd., Huizhou 516081, China;

<sup>§</sup>Department of Mechanical Engineering, The Hong Kong Polytechnic University, Hong Hom, Kowloon,  
Hong Kong SAR, China;

<sup>‡</sup>Key Laboratory fuel cell of Guangdong province, School of Chemistry and Chemical Engineering, South  
China University of Technology, Guangzhou, 510640, China.

## The E-mail:Corresponding Author:

[chyfdeng@scut.edu.cn](mailto:chyfdeng@scut.edu.cn) (Y. F. Deng); [guohua.chen@polyu.edu.hk](mailto:guohua.chen@polyu.edu.hk) (G. H. Chen)

Number of pages: 7.

Number of figures: 6.

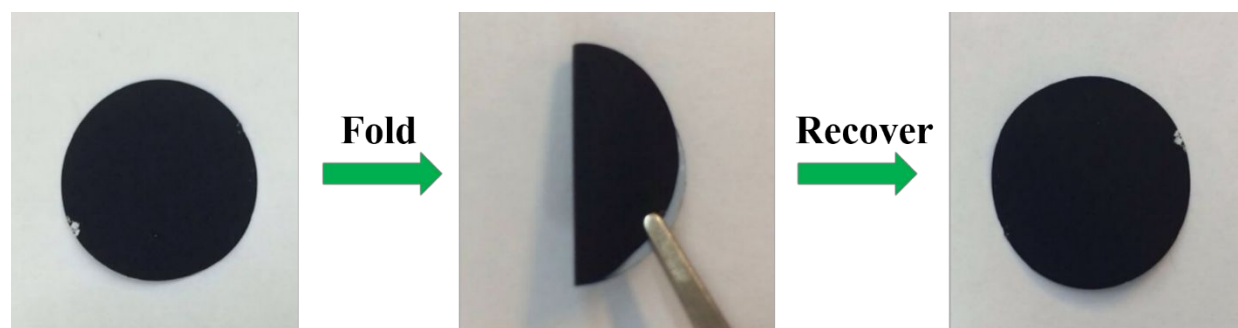

**Figure S1.** Optical image of Co(OH)<sub>2</sub>@CNF/KB-modified separator with the folding test.

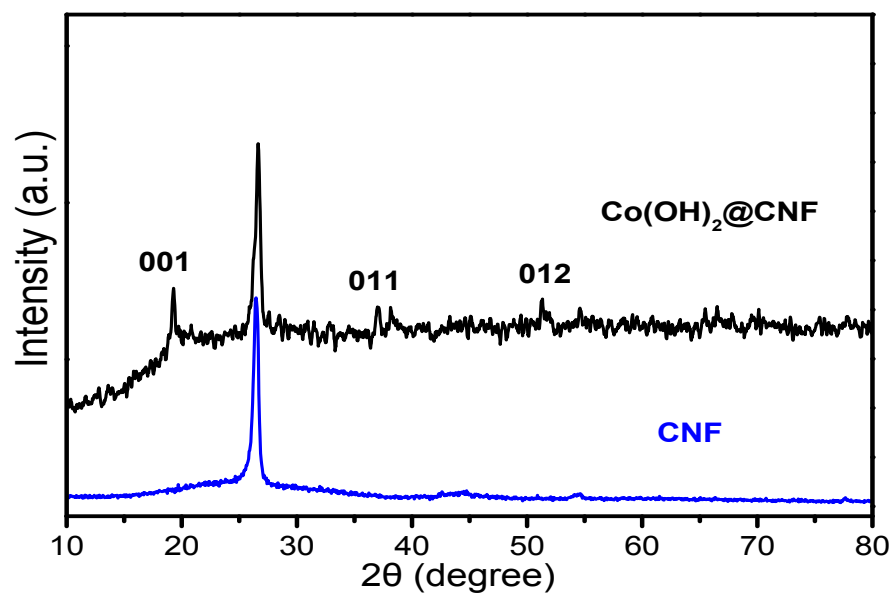

**Figure S2.** XRD inspection of CNF and Co(OH)<sub>2</sub>@CNF/KB.

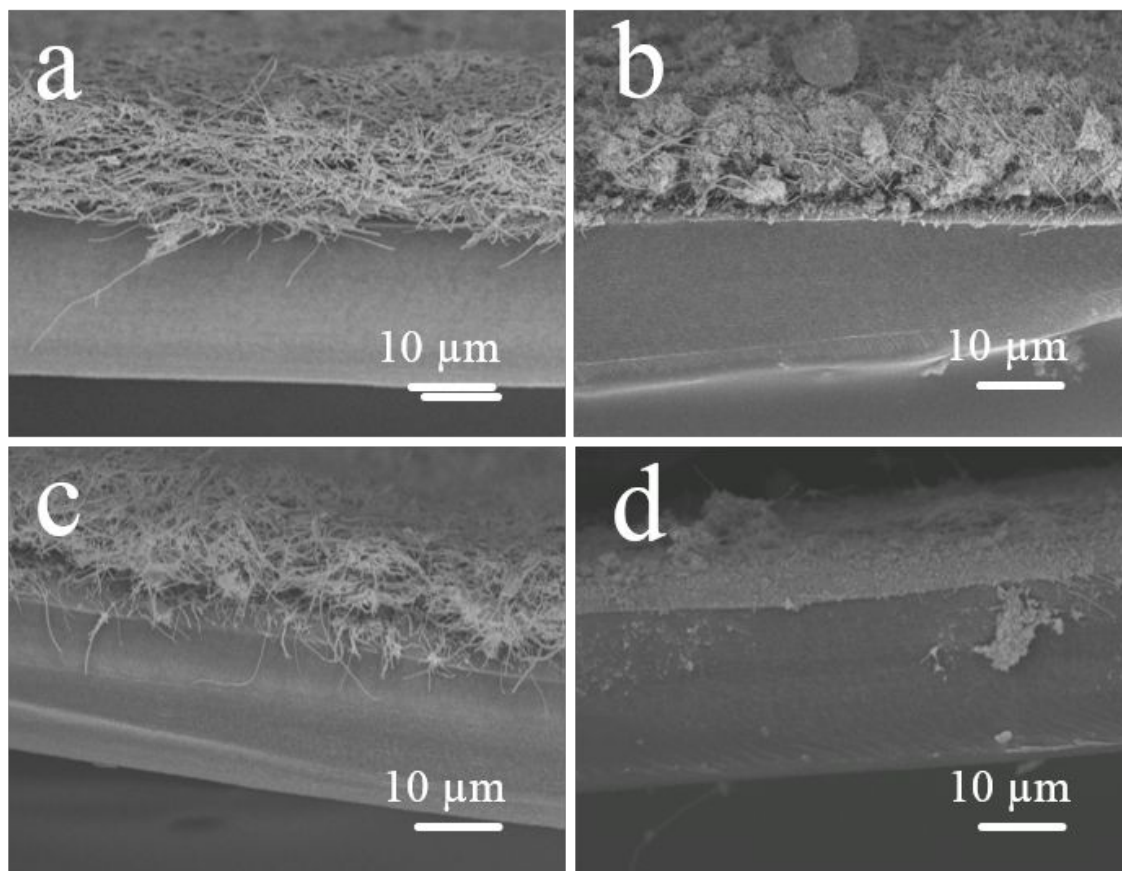

**Figure S3.** Cross-section SEM observation of (a) the CNF, (b) CNF/KB, (c) Co(OH)<sub>2</sub>@CNF and (d) Co(OH)<sub>2</sub>@CNF/KB layer on the commercial separator.

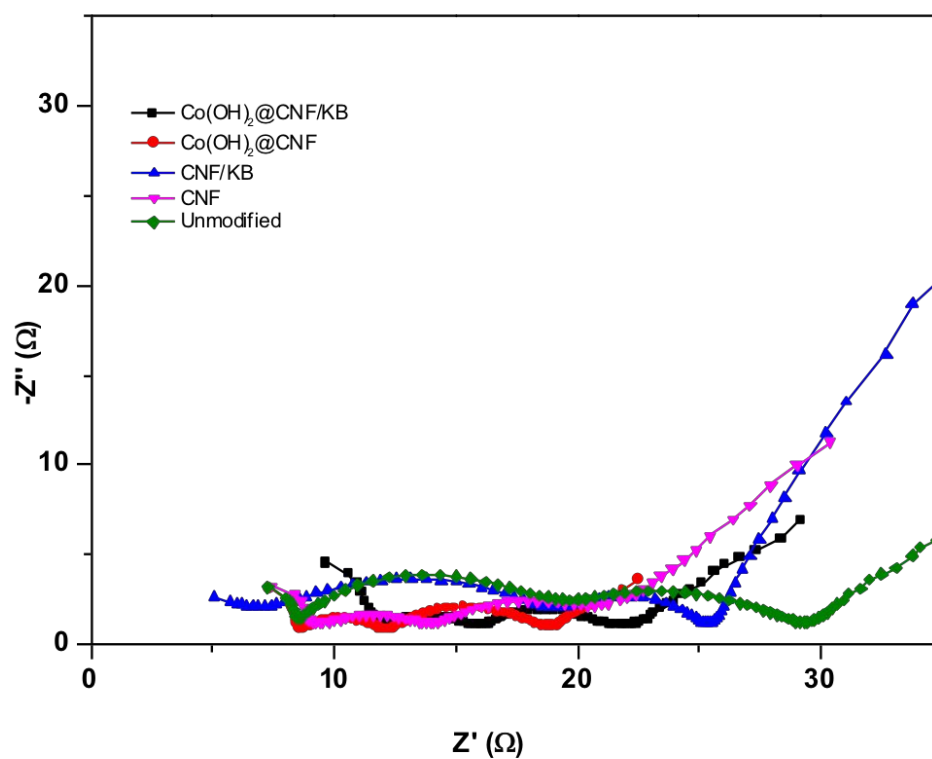

**Figure S4.** EIS performance of the cycled cells (100 cycles at 1.0 C rate) with different coating layers on the separator.

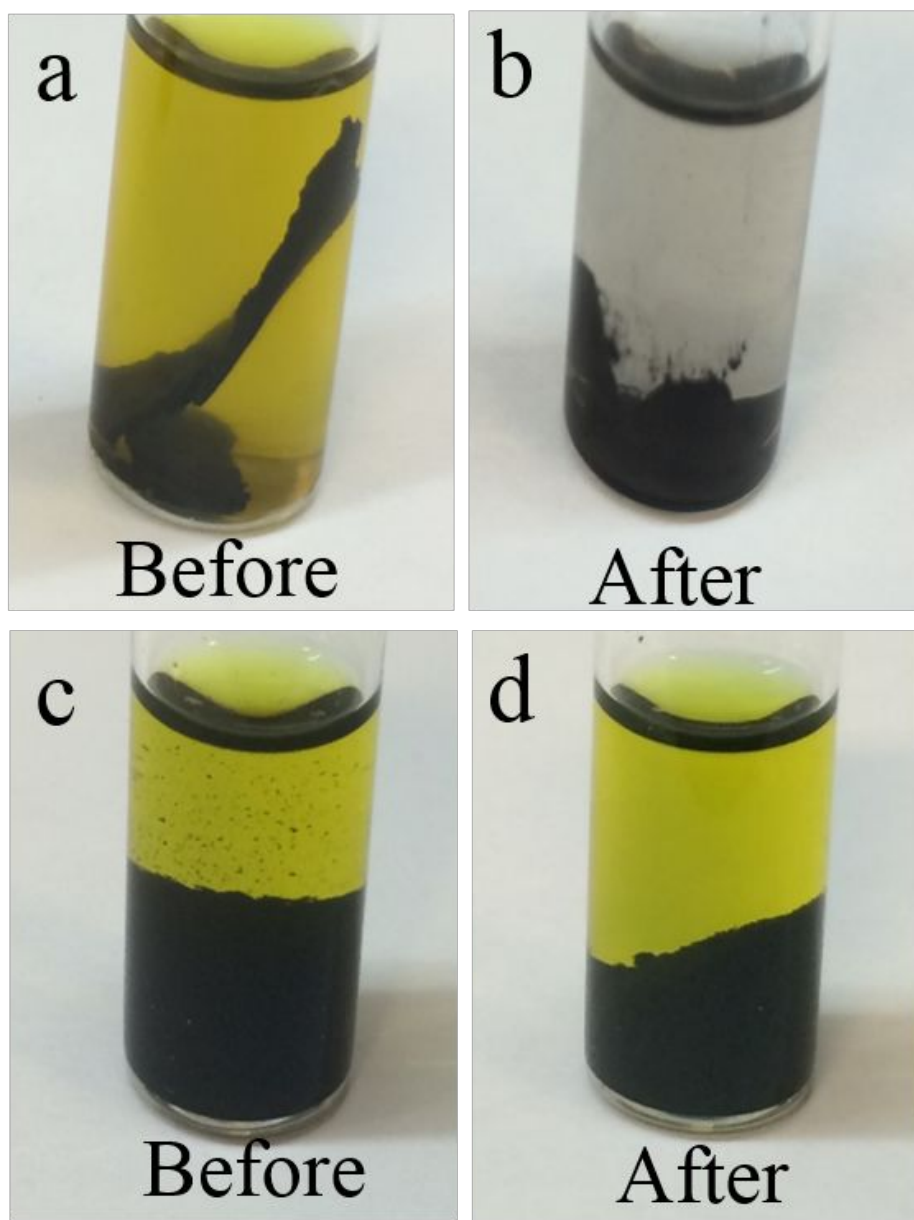

**Figure S5.** Visualized adsorption of  $\text{Li}_2\text{S}_4$  by  $\text{Co}(\text{OH})_2@\text{CNF}$  (a) before and (b) after stirring.  
Visualized adsorption of  $\text{Li}_2\text{S}_4$  by CNF (a) before and (b) after stirring.

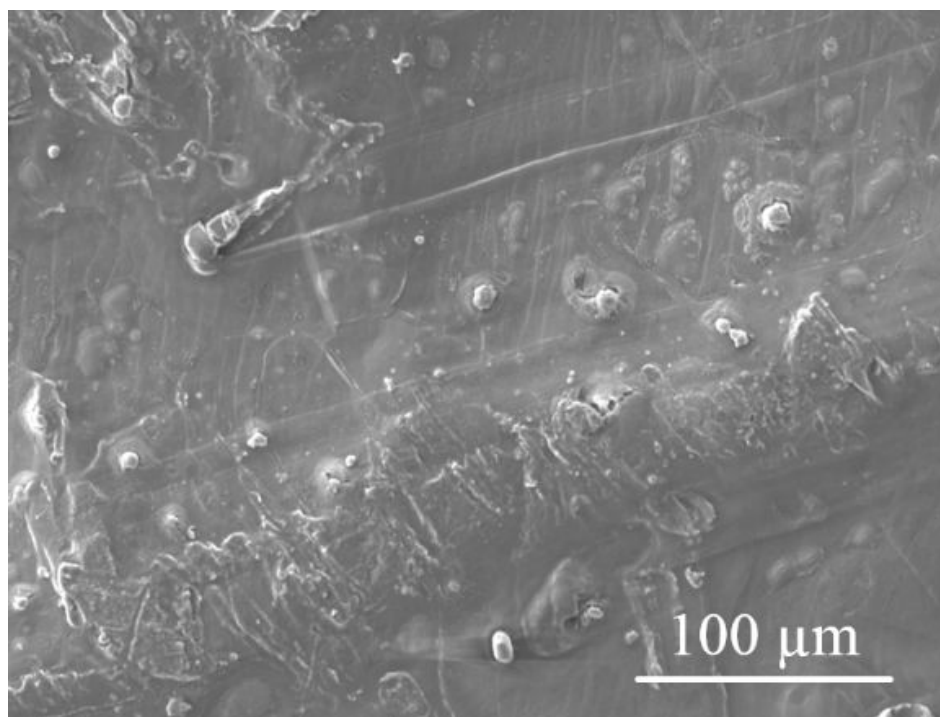

**Figure S6.** SEM inspection of fresh lithium anode.
